# Supplementary material
Source: PubMed Central journal article supplement (PMC4229427)

# Supplementary Figure 1

Fetal fallopian tube (21 weeks)

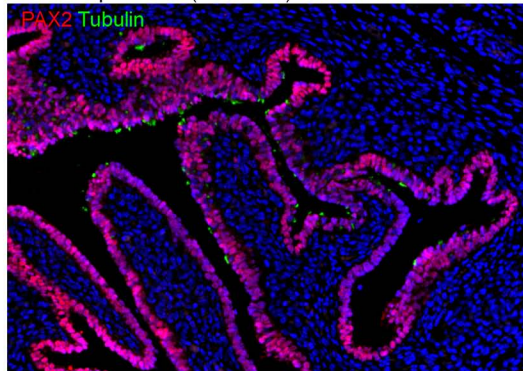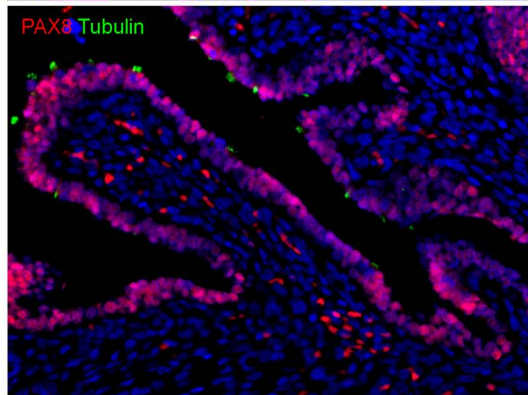

Adult fallopian tube

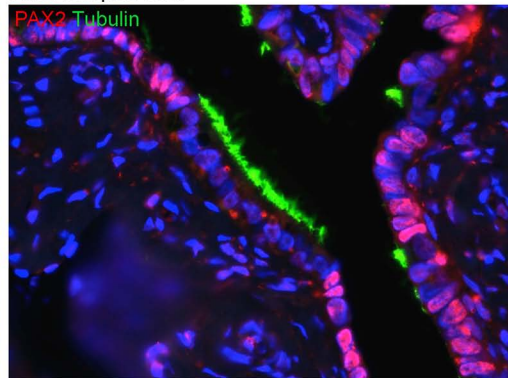

## Supplementary Figure 2

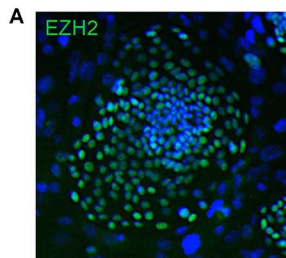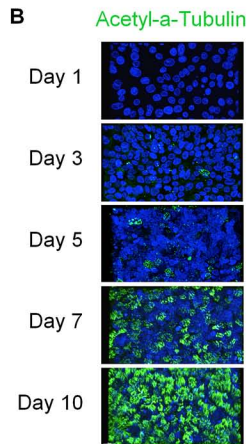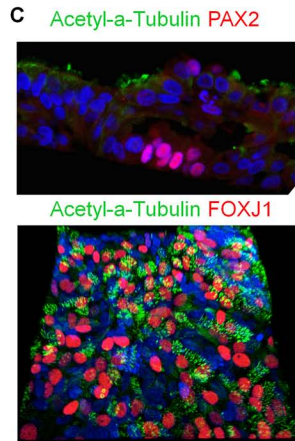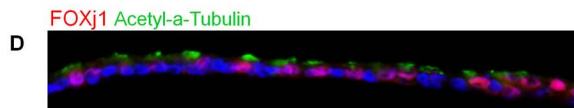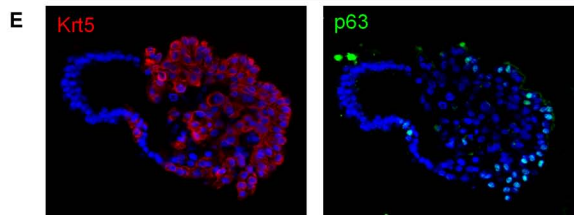

### Supplementary Figure 3

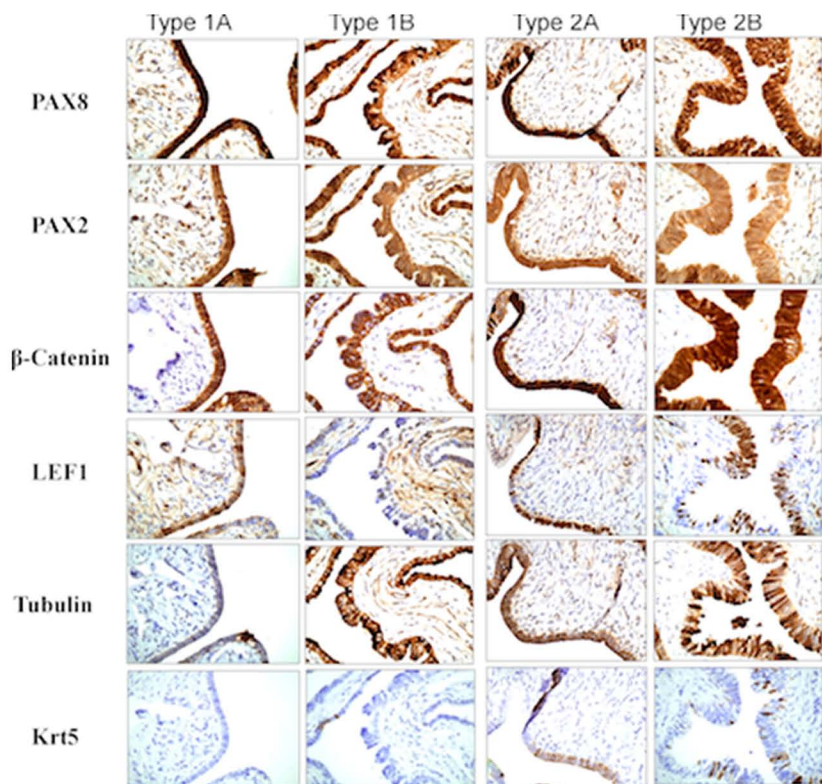

# Supplementary figure 4

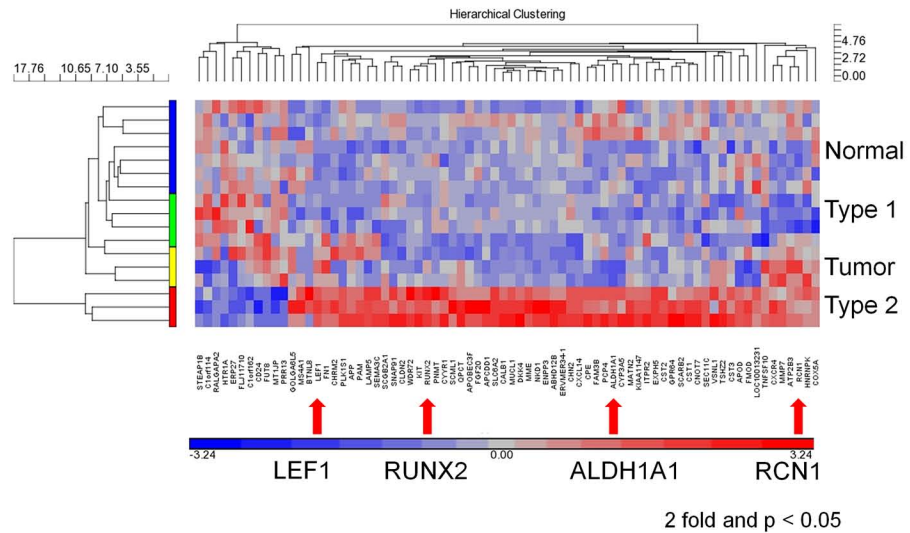

## Supplementary Figure 5

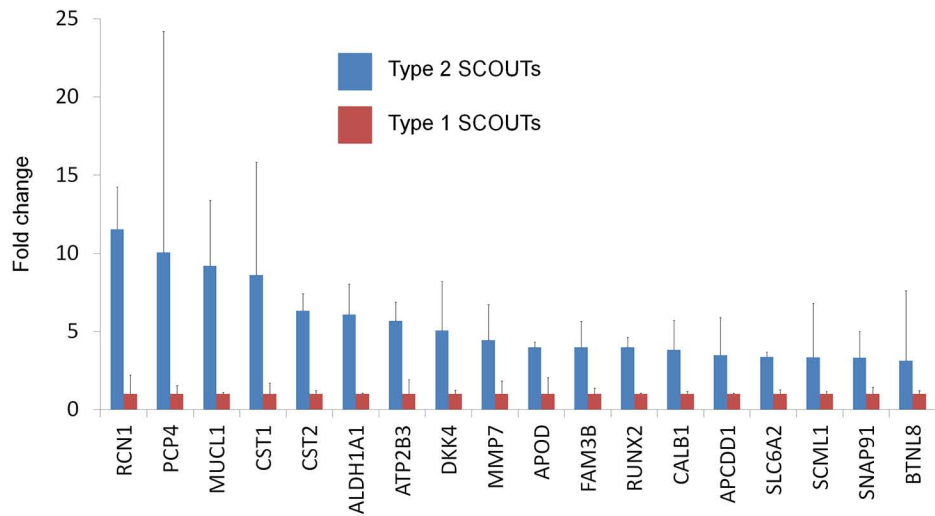



# Supplementary figure 6

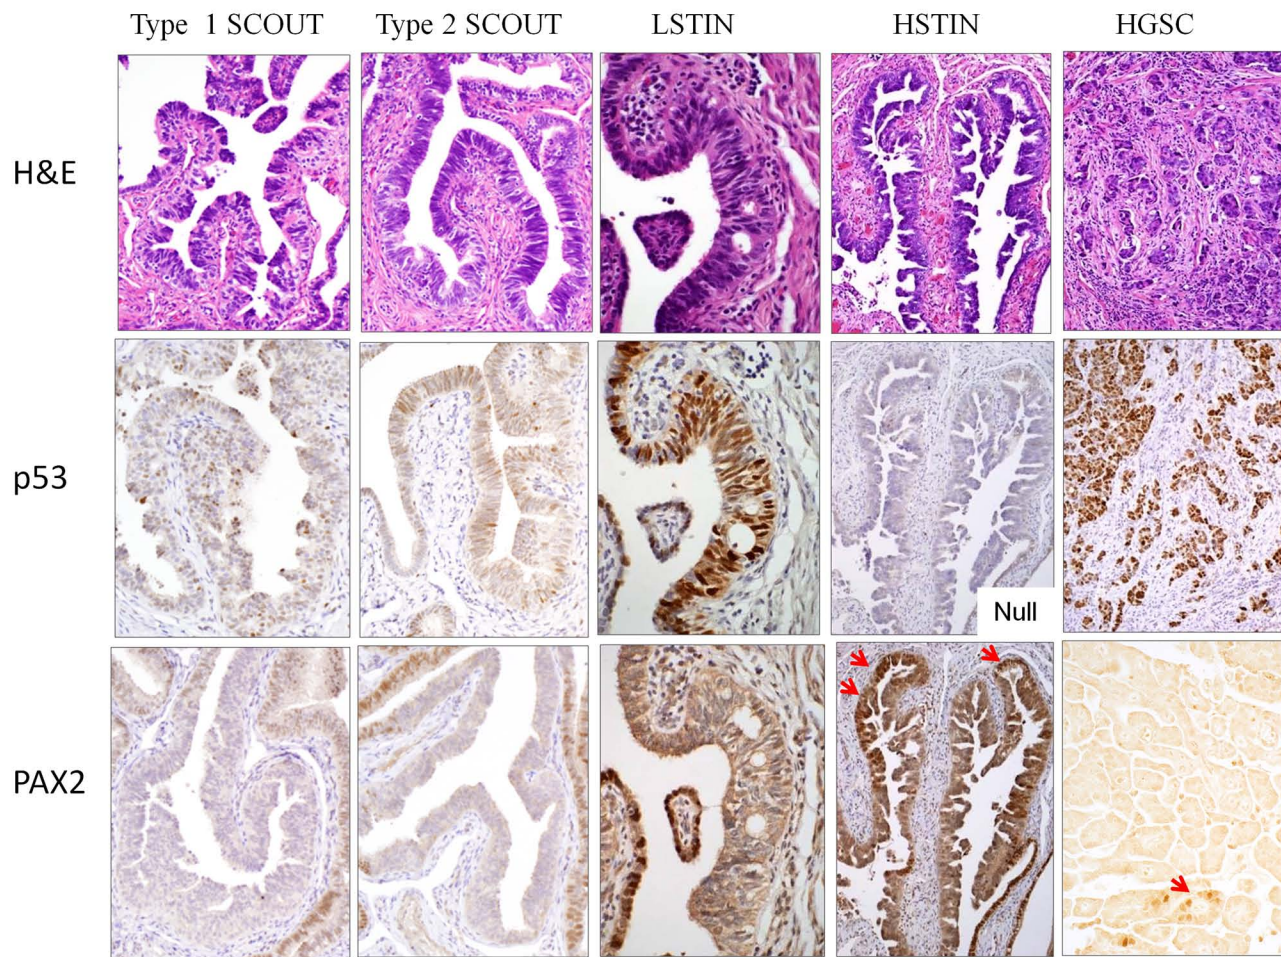

Supplement: NIHMS619745-supplement-Supp_FigureS1-S6.pdf [file NIHMS619745-supplement-Supp_FigureS1-S6.pdf]
